# Supplementary material
Source: PubMed Central journal article supplement (PMC3759995)

Supplemental  
Figure 1

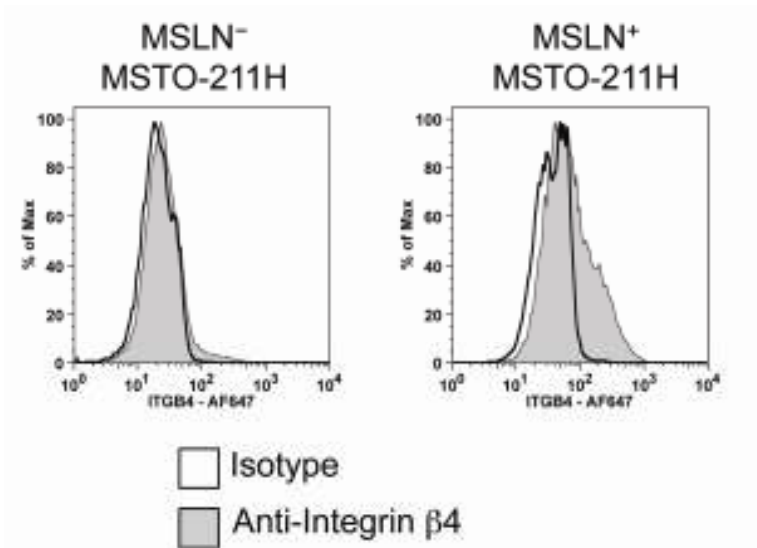

Supplemental  
Figure 2

**Mesothelin knockdown increases survival in the AB12 orthotopic syngeneic MPM model**

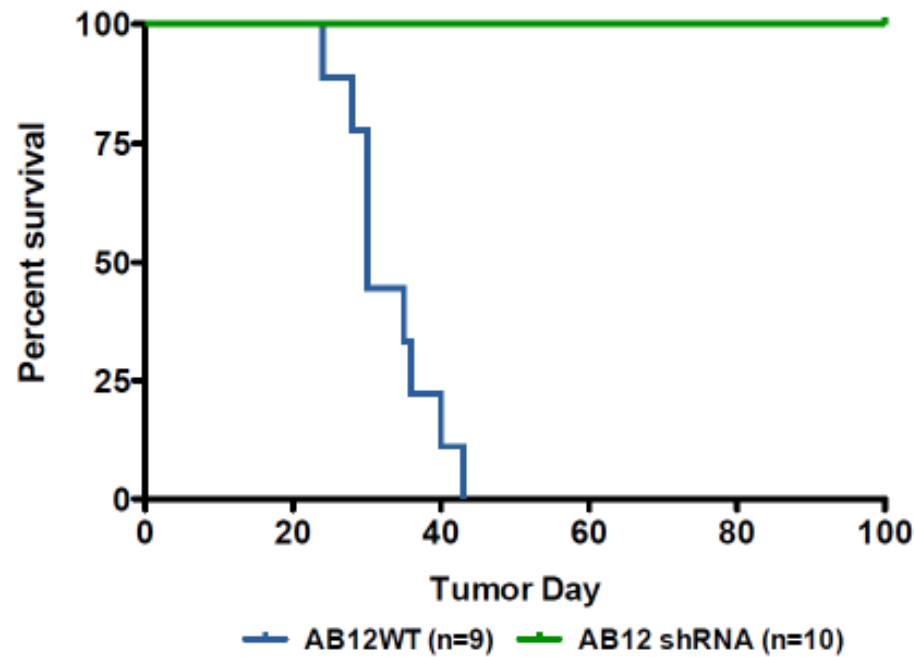

Supplement: NIHMS394789-supplement-supplement_1.pdf [file NIHMS394789-supplement-supplement_1.pdf]
